# Supplementary material for: Cloning and Functional Analysis of FLJ20420: A Novel Transcription Factor for the BAG-1 Promoter
Source: PLoS One. 2012 May 2;7(5):e34832. doi: 10.1371/journal.pone.0034832 (PMC3342300; doi:10.1371/journal.pone.0034832)
Supplement: Table S2 — The downregulated genes in A549-FLJ-siRNA cells. (XLS) [file pone.0034832.s004.xls]

## Sheet: Sheet1
No	sorte	A549 2008-07-22 One_vs neg_Change		Descriptions
234513_at	-3.1	D	CIG30	gb:AF292387 Homo sapiens CIG30 gene
1569129_s_at	-1.4	D	clone IMAGE:4695648	gb:BC016013 Homo sapiens, clone IMAGE:4695648
223236_at	-1	D	DKFZp434K1421	gb:AL136806 Homo sapiens mRNA; cDNA DKFZp434K1421
231193_s_at	-1.2	D	DKFZp586H0324	gb:BE326569 /DB_XREF=gi:9200345 /DB_XREF=hw05f09.x1 /CLONE=IMAGE:3182057 /FEA=EST /CNT=22 /TID=Hs.18016.1 /TIER=Stack /STK=18 /UG=Hs.18016 /UG_TITLE=Homo sapiens mRNA; cDNA DKFZp586H0324 (from clone DKFZp586H0324)
209900_s_at	-1	D	DKFZp762B2310	gb:AL162079 Homo sapiens cDNA DKFZp762B2310
203810_at	-1	D	DNAJB4	gb:BG252490 DnaJ (Hsp40) homolog, subfamily B, member 4
230061_at	-1.4	D	ESTs	gb:AW338625 ESTs
230069_at	-2.3	D	ESTs	gb:BF593817 ESTs
230206_at	-1	D	ESTs	gb:AI692645 ESTs
230207_s_at	-1	D	ESTs	gb:AI692645 ESTs
230211_at	-2.2	D	ESTs	gb:R32893 ESTs
230261_at	-1.3	D	ESTs	gb:AA552969 ESTs
227322_s_at	-1	D	FLJ10889	gb:BE464077 hypothetical protein FLJ10889
224653_at	-1.1	D	FLJ11074	gb:U88989 Homo sapiens cDNA FLJ11074 fis, clone PLACE1005027
232007_at	-2.1	D	FLJ11660	gb:AU145356 Homo sapiens cDNA FLJ11660 fis
1557285_at	-1	D	FLJ13387	gb:AI891075 Homo sapiens cDNA FLJ13387 fis
219858_s_at	-1.4	D	FLJ20160	gb:NM_017694 Homo sapiens hypothetical protein FLJ20160
231042_s_at	-1.7	D	FLJ21715	gb:AA809487 Homo sapiens cDNA: FLJ21715 fis
226799_at	-1.2	D	FLJ23228	gb:AK026881.1 Homo sapiens cDNA: FLJ23228 fis, clone CAE06654.
1556828_at	-4.4	D	FLJ36457	gb:H23431 Homo sapiens cDNA FLJ36457 fis
222614_at	-1.1	D	GL011	gb:AF212232 Homo sapiens GL011 mRNA
201034_at	-1	D	HADHSC	gb:BE545756 L-3-hydroxyacyl-Coenzyme A dehydrogenase, short chain
227510_x_at	-1.1	D	HDAC3	gb:AL037917 histone deacetylase 3
203157_s_at	-1.7	D	KIAA0838	gb:AB020645 Homo sapiens mRNA for KIAA0838 protein
225847_at	-1.1	D	KIAA1363	gb:AB037784 Homo sapiens mRNA for KIAA1363 protein
1555272_at	-1.4	D	LOC222967	gb:BC044242 Homo sapiens, Similar to hypothetical protein LOC222967
202007_at	-1	D	NID	gb:BF940043 nidogen (enactin)
204361_s_at	-1.9	D	RA70	gb:AB014486 Homo sapiens mRNA for RA70
200908_s_at	-1.2	D	ribosomal protein, large P2,	gb:BC005354 Homo sapiens, ribosomal protein, large P2, clone MGC:12453
202983_at	-1.3	D	SMARCA3	gb:AI760760 SWISNF related, matrix associated, actin dependent regulator of chromatin, subfamily a, member 3
203504_s_at	-1.4	D	ABCA1	gb:NM_005502 Homo sapiens ATP-binding cassette, sub-family A , member 1
202381_at	-1.2	D	ADAM9	gb:NM_003816 Homo sapiens a disintegrin and metalloproteinase domain 9
222444_at	-1.3	D	ALEX3	gb:AL121883 Human DNA sequence from clone RP4-545K15 on chromosome Xq21.33-22.3
222556_at	-1.4	D	ALG5	gb:AF102850 Homo sapiens dolichyl-phosphate beta-glucosyltransferase
221871_s_at	-1.1	D	ALK	gb:BF057492 anaplastic lymphoma kinase (Ki-1)
207992_s_at	-1.2	D	AMPD3	gb:NM_000480 Homo sapiens adenosine monophosphate deaminase (isoform E)
217590_s_at	-1.2	D	ANKTM1	gb:AA502609 Homo sapiens ankyrin-like with transmembrane domains 1 (ANKTM1), mRNA
1568126_at	-1.4	D	annexin II, 5UTR	gb:D28364 Human mRNA for annexin II, 5UTR
211241_at	-1	D	ANXA2P2	gb:M62895 Human lipocortin (LIP) 2 pseudogene
202512_s_at	-1	D	APG5L	gb:NM_004849 Homo sapiens APG5 (autophagy 5, S. cerevisiae)-like
228520_s_at	-1	D	APLP2	gb:AA022510 amyloid beta (A4) precursor-like protein 2
202631_s_at	-1.1	D	APPBP2	gb:NM_006380 Homo sapiens amyloid beta precursor protein (cytoplasmic tail)-binding protein 2
230619_at	-1.3	D	ARNT	gb:AI768497 aryl hydrocarbon receptor nuclear translocator
231016_s_at	-1.2	D	ARNT	gb:BE465380 aryl hydrocarbon receptor nuclear translocator
217776_at	-1	D	ARSDR1	gb:AF167438 Homo sapiens androgen-regulated short-chain dehydrogenasereductase 1
226242_at	-1.1	D	ATF5	gb:BF515750 activating transcription factor 5
209935_at	-1	D	ATP2C1	gb:AF225981 Homo sapiens calcium transport ATPase ATP2C1
214244_s_at	-1.1	D	ATP6H	gb:AV717561 =ATPase, H+ transporting, lysosomal (vacuolar proton pump) 9kD
214331_at	-1	D	AVIL	gb:AI796813 advillin
205681_at	-1	D	BCL2A1	gb:NM_004049 Homo sapiens BCL2-related protein A1
215629_s_at	-1.1	D	BCMSUNL	gb:AA905286 BCMS-upstream neighbor-like
203840_at	-1.5	D	BLZF1	gb:NM_003666 Homo sapiens basic leucine zipper nuclear factor 1
229851_s_at	-1	D	BM042	gb:H63435 uncharacterized bone marrow protein BM042
202265_at	-1.3	D	BMI1	gb:NM_005180 Homo sapiens murine leukemia viral (bmi-1) oncogene homolog
225240_s_at	-1	D	BRPF3	gb:BE220026 bromodomain and PHD finger containing, 3
222613_at	-1.1	D	C12ORF4	gb:AA195410 chromosome 12 open reading frame 4
219439_at	-1.8	D	C1GALT1	gb:NM_020156 Homo sapiens core1 UDP-galactose:N-acetylgalactosamine-alpha-R beta 1,3-galactosyltransferase
216962_at	-1.2	D	C1QBP	gb:M69039 complement component 1, q subcomponent binding protein
229671_s_at	-1.3	D	C21ORF45	gb:N93774 chromosome 21 open reading frame 45
1554149_at	-1.2	D	C3orf4	gb:BC01361 Homo sapiens, chromosome 3 open reading frame 4,
202396_at	-1.1	D	CA150	gb:NM_006706 Homo sapiens transcription factor CA150
202763_at	-1.6	D	CASP3	gb:NM_004346 Homo sapiens caspase 3, apoptosis-related cysteine protease
211814_s_at	-1.1	D	CCNE2	gb:AF112857 Homo sapiens cyclin E2 splice variant 1
201326_at	-1.1	D	CCT6A	gb:BE737030 CCT6A chaperonin containing TCP1, subunit 6A (zeta 1)
209795_at	-4.8	D	CD69	gb:L07555 Homo sapiens early activation antigen CD69
231534_at	-1.7	D	CDC2	gb:AA749427 cell division cycle 2, G1 to S and G2 to M
211317_s_at	-1.3	D	CFLAR	gb:AF041461 Homo sapiens I-FLICE isoform 4
224628_at	-1.1	D	CL25084	gb:AF131743 Homo sapiens clone 25084 mRNA sequence,
209508_x_at	-1.2	D	clarp	gb:AF005774 Homo sapiens caspase-like apoptosis regulatory protein
232382_s_at	-1.4	D	clone 122482	gb:BE150929 Homo sapiens clone 122482 unknown mRNA
212799_at	-1	D	clone 23570	gb:BE217875 Homo sapiens clone 23570 mRNA sequence
212731_at	-1.5	D	clone 23589	gb:U79297 Human clone 23589 mRNA sequence
214769_at	-1.5	D	clone 23809	gb:AF052117 Homo sapiens clone 23809 mRNA sequence.
215262_at	-1.6	D	clone 24629	gb:AF052160 Homo sapiens clone 24629 mRNA sequence
213016_at	-1.1	D	clone 24630	gb:AA573805 Homo sapiens clone 24630 mRNA sequence
224047_at	-2.4	D	clone FLB5227 PRO1367	gb:AF130056 Homo sapiens clone FLB5227 PRO1367
1565823_at	-1.5	D	clone hmd1a12m3.	gb:BF855173 Human HepG2 3 region MboI cDNA, clone hmd1a12m3.
1566342_at	-1.2	D	clone hmd2a08m3.	gb:R34841 Human HepG2 3 region MboI cDNA, clone hmd2a08m3.
1569098_s_at	-1.4	D	clone IMAGE:4273542	gb:BU508386 Homo sapiens, clone IMAGE:4273542, mRNA
1558489_at	-1.5	D	clone IMAGE:4715570	gb:BC020899 Homo sapiens, clone IMAGE:4715570,
1569469_a_at	-1.4	D	clone IMAGE:4797854	gb:BC04032 Homo sapiens, Similar to LIM homeobox protein 8, clone IMAGE:4797854
1570244_at	-4.1	D	clone IMAGE:4800236	gb:BC030114 Homo sapiens, clone IMAGE:4800236
1570338_at	-2.6	D	clone IMAGE:4933000	gb:BC019875 Homo sapiens, clone IMAGE:4933000
1559501_at	-2.1	D	clone IMAGE:5228477	gb:BC037580.1 Homo sapiens, clone IMAGE:5228477, mRNA.
1556194_a_at	-1.2	D	clone IMAGE:5285801	gb:BC042959 Homo sapiens, clone IMAGE:5285801
1558882_at	-2.5	D	clone IMAGE:5289038	gb:BI868572 Homo sapiens, clone IMAGE:5289038, mRNA
1556834_at	-2.3	D	clone IMAGE:5296106	gb:BC042986 Homo sapiens, clone IMAGE:5296106
223608_at	-1	D	clone MGC:12458	gb:BC005357 Homo sapiens, Similar to RIKEN cDNA 1700073K01 gene, clone MGC:12458,
1565951_s_at	-1	D	clone MM K2	gb:AJ293392 Homo sapiens mRNA differentially expressed in malignant melanoma, clone MM K2
1568574_x_at	-2.4	D	clone SMAP41	gb:AB019562 Homo sapiens mRNA expressed only in placental villi, clone SMAP41
1558692_at	-1.7	D	clone ZD63A01	gb:AW090182 Homo sapiens full length insert cDNA clone ZD63A01
213930_at	-1	D	clone:843Ex	gb:N51708 Homo sapiens mRNA from chromosome 5q21-22,
224352_s_at	-1.1	D	cofilin isoform 1	gb:AF134802 Homo sapiens cofilin isoform 1
213736_at	-1.2	D	COX5B	gb:AI557312 cytochrome c oxidase subunit Vb
201940_at	-1	D	CPD	gb:AA897514 carboxypeptidase D
201941_at	-1	D	CPD	gb:BE349147 carboxypeptidase D
228496_s_at	-1.1	D	CRIM1	gb:AW243081 cysteine-rich motor neuron 1
224559_at	-1.4	D	CS-1	gb:AF001540 calcineurin-binding protein calsarcin-1
210229_s_at	-1.6	D	CSF2	gb:M11734 colony stimulating factor 2 (granulocyte-macrophage)
224595_at	-1.8	D	CTL1	gb:AK022549 transporter-like protein
224596_at	-2.1	D	CTL1	gb:AI634866 transporter-like protein
228485_s_at	-1.1	D	CTL1	gb:AW165999 transporter-like protein
202468_s_at	-1	D	CTNNAL1	gb:NM_003798 Homo sapiens catenin (cadherin-associated protein), alpha-like 1
202901_x_at	-1.1	D	CTSS	gb:BC002642 Homo sapiens, cathepsin S, clone MGC:3886
206153_at	-1.4	D	CYP4F11	gb:NM_021187 Homo sapiens cytochrome P450, subfamily IVF, polypeptide 11
223292_s_at	-1.3	D	DC37	gb:AF265439 Homo sapiens DC37
217864_s_at	-1	D	DDXBP1	gb:NM_016166 Homo sapiens DEADH (Asp-Glu-Ala-AspHis) box binding protein 1
223261_at	-1	D	DINP	gb:AF194973 Homo sapiens DINP protein mRNA
225313_at	-1	D	DJ551D2.5	gb:AI627538 hypothetical protein dJ551D2.5
1560662_s_at	-1.2	D	DKFZp313L2232	gb:AL833132 Homo sapiens mRNA; cDNA DKFZp313L2232
203487_s_at	-1.6	D	DKFZP434A043	gb:NM_015396 Homo sapiens DKFZP434A043 protein
232267_at	-4.8	D	DKFZp434B1272	gb:AL162032 Homo sapiens mRNA; cDNA DKFZp434B1272
219313_at	-3	D	DKFZp434C0328	gb:NM_017577 Homo sapiens hypothetical protein DKFZp434C0328
209780_at	-1.2	D	DKFZp434D166	gb:AL136883 Homo sapiens DKFZp434D166
226435_at	-1	D	DKFZp434F053	gb:AU145309 Homo sapiens mRNA; cDNA DKFZp434F053
228611_s_at	-1.1	D	DKFZP434F2021	gb:BF197274 DKFZP434F2021 protein
232893_at	-3.1	D	DKFZp434H2226	gb:AL137370 Homo sapiens mRNA; cDNA DKFZp434H2226
200970_s_at	-1	D	DKFZp434L1621	gb:AL136807 Homo sapiens mRNA; cDNA DKFZp434L1621
214716_at	-1.2	D	DKFZp434P0116	gb:AW504018 hypothetical protein DKFZp434P0116
1553111_a_at	-1.2	D	DKFZp547E1912	gb:NM_152903 hypothetical protein DKFZp547E1912
203427_at	-1.4	D	DKFZP547E2110	gb:NM_014034 Homo sapiens DKFZP547E2110 protein
226479_at	-1.5	D	DKFZp547M073	gb:AL359577 Homo sapiens mRNA; cDNA DKFZp547M073
212500_at	-1.1	D	DKFZp564C046	gb:AL049319 Homo sapiens mRNA; cDNA DKFZp564C046
223155_at	-1.3	D	DKFZp564D1378	gb:AL136681 Homo sapiens mRNA; cDNA DKFZp564D1378 (
222453_at	-1.3	D	DKFZp564E227	gb:AL136693 Homo sapiens mRNA; cDNA DKFZp564E227
212333_at	-1.1	D	DKFZp564F0522	gb:AL049943 Homo sapiens cDNA DKFZp564F0522
213032_at	-1.1	D	DKFZp564H1916	gb:AI186739 Homo sapiens mRNA; cDNA DKFZp564H1916
223588_at	-5.5	D	DKFZp564I0422	gb:AL136607 Homo sapiens mRNA; cDNA DKFZp564I0422
210176_at	-1.8	D	DKFZp564I0682	gb:AL050262 Homo sapiens cDNA DKFZp564I0682
232451_at	-1.2	D	DKFZp564I0816	gb:AL110176 Homo sapiens mRNA; cDNA DKFZp564I0816
234544_at	-2.3	D	DKFZp564J052	gb:AL080067 Homo sapiens mRNA; cDNA DKFZp564J052
221553_at	-1.4	D	DKFZp564K142	gb:AL136636 Homo sapiens mRNA; cDNA DKFZp564K142
212698_s_at	-1	D	DKFZP564M1416	gb:BF966021 DKFZP564M1416 protein
226432_at	-1	D	DKFZp566C034	gb:AI276880 Homo sapiens mRNA; cDNA DKFZp566C034
231576_at	-1.3	D	DKFZp566C034	gb:AA829940 Homo sapiens mRNA; cDNA DKFZp566C034
229259_at	-2.2	D	DKFZp566O224	gb:AL133013 Homo sapiens mRNA; cDNA DKFZp566O224
226066_at	-1.4	D	DKFZp586C0224	gb:AL117653.1 omo sapiens mRNA; cDNA DKFZp586C0224
1566257_at	-1.5	D	DKFZp586C1322	gb:AL049452 Homo sapiens mRNA; cDNA DKFZp586C1322
39582_at	-2.3	D	DKFZp586D1122	Cluster Incl. AL050166:Homo sapiens mRNA; cDNA DKFZp586D1122 (
213295_at	-1.7	D	DKFZp586D1122	gb:AA555096 Homo sapiens mRNA; cDNA DKFZp586D1122
215029_at	-1.1	D	DKFZp586E2317	gb:AL117451 Homo sapiens mRNA; cDNA DKFZp586E2317
215447_at	-1	D	DKFZp586J0323	gb:AL080215 Homo sapiens mRNA; cDNA DKFZp586J0323
226628_at	-1.6	D	DKFZp586L1121	gb:BG259856 Homo sapiens mRNA; cDNA DKFZp586L1121
226863_at	-1.4	D	DKFZp586L2424	gb:AI674565 Homo sapiens mRNA; cDNA DKFZp586L2424
215772_x_at	-1	D	DKFZp586M2023	gb:AL050226 Homo sapiens mRNA; cDNA DKFZp586M2023
1556021_at	-2.2	D	DKFZp667K0825	gb:BF105980 Homo sapiens mRNA; cDNA DKFZp667K0825
223089_at	-1.5	D	DKFZp761C241	gb:AI805297 hypothetical protein DKFZp761C241
216870_x_at	-1.1	D	DLEU2	gb:AF264787 deleted in lymphocytic leukemia, 2
209187_at	-1.4	D	DR1	gb:AW516932 down-regulator of transcription 1, TBP-binding
232204_at	-1	D	EBF	gb:AF208502 Homo sapiens early B-cell transcription factor
237241_at	-1.7	D	ECT2	gb:AW269645 epithelial cell transforming sequence 2 oncogene
213087_s_at	-1.1	D	EEF1D	gb:BF690020 eukaryotic translation elongation factor 1 delta
214395_x_at	-1.2	D	EEF1D	gb:AI335509 eukaryotic translation elongation factor 1 delta (guanine nucleotide exchange protein)
213907_at	-1.4	D	EEF1E1	gb:N32257 eukaryotic translation elongation factor 1 epsilon 1
208264_s_at	-1.1	D	EIF3S1	gb:NM_003758 Homo sapiens eukaryotic translation initiation factor 3, subunit 1
208770_s_at	-3.1	D	EIF4EBP2	gb:BC005057 Homo sapiens, eukaryotic translation initiation factor 4E binding protein 2
219532_at	-1	D	ELOVL4	gb:NM_022726 Homo sapiens Stargardt disease 3
217678_at	-1.1	D	EST	gb:AA488687 ESTs
224899_s_at	-1.3	D	EST	gb:BG292405 Homo sapiens clone FLB3024 PRO0756 mRNA, complete cds
226119_at	-1	D	EST	gb:AA453163 Homo sapiens clone 122482 unknown mRNA
213750_at	-1.3	D	ESTs	gb:AA928506 ESTs
217540_at	-1	D	ESTs	gb:AA721025 ESTs
221895_at	-1.3	D	ESTs	gb:AW469184 ESTs
224744_at	-1.1	D	ESTs	gb:AW628838 ESTs
225639_at	-1.9	D	ESTs	gb:N21390 ESTs
225661_at	-1.5	D	ESTs	gb:AA811138 ESTs,
225669_at	-1	D	ESTs	gb:AA133989 ESTs,
225725_at	-1.2	D	ESTs	gb:AL533234 /DB_XREF=gi:12796727 /DB_XREF=AL533234 /CLONE=CS0DN003YO15 (3 prime) /FEA=EST /CNT=74 /TID=Hs.26418.0 /TIER=Stack /STK=32 /UG=Hs.26418 /UG_TITLE=ESTs
225748_at	-1	D	ESTs	gb:AI458051 ESTs
225856_at	-1.1	D	ESTs	gb:BF512028 ESTs
225902_at	-1.3	D	ESTs	gb:AW194716 ESTs
225950_at	-1	D	ESTs	gb:AV703731 ESTs
226333_at	-1.1	D	ESTs	gb:AV700030 ESTs
226447_at	-1.1	D	ESTs	gb:BG290742 ESTs
226525_at	-1	D	ESTs	gb:N51102 ESTs
226532_at	-1.4	D	ESTs	gb:AL563613 ESTs
226601_at	-1.7	D	ESTs	gb:AI761597 ESTs
226779_at	-1.1	D	ESTs	gb:BF432857 ESTs
226962_at	-1.3	D	ESTs	gb:AW299558 ESTs
226970_at	-1	D	ESTs	gb:AI690694 ESTs
227040_at	-1.2	D	ESTs	gb:AI655763 ESTs
227314_at	-1.4	D	ESTs	gb:N95414 ESTs
227620_at	-1.4	D	ESTs	gb:AV721564 ESTs
227623_at	-1	D	ESTs	gb:H16409 ESTs
227630_at	-1.3	D	ESTs	gb:AW274445 ESTs
227646_at	-1.6	D	ESTs	gb:BG435302 ESTs
227685_at	-1.1	D	ESTs	gb:AI767750 ESTs
227740_at	-1.3	D	ESTs	gb:AW173222 ESTs
227761_at	-1.2	D	ESTs	gb:AW235548 ESTs
227947_at	-1.1	D	ESTs	gb:AV724107 ESTs
227973_at	-1	D	ESTs	gb:BF130937 ESTs
228062_at	-1.2	D	ESTs	gb:AW025330 ESTs
228063_s_at	-1.9	D	ESTs	gb:AW025330 ESTs
228315_at	-1.1	D	ESTs	gb:AI632728 ESTs
228328_at	-1.4	D	ESTs	gb:AI982758 ESTs
228345_at	-1.3	D	ESTs	gb:AI745136 ESTs
228365_at	-1.2	D	ESTs	gb:AI765180 ESTs
228389_at	-1.4	D	ESTs	gb:BF197118 ESTs
228416_at	-1.2	D	ESTs	gb:AI149508 ESTs
228423_at	-2	D	ESTs	gb:AI887898 ESTs
228452_at	-1.1	D	ESTs	gb:AA827865 ESTs
228478_at	-1.1	D	ESTs	gb:AA889954 ESTs,
228479_at	-1.3	D	ESTs	gb:AI094180 ESTs
228495_at	-1	D	ESTs	gb:AI880633 ESTs
228561_at	-1.1	D	ESTs	gb:BF510563 ESTs
228565_at	-1	D	ESTs	gb:AI809005 ESTs
228603_at	-1.1	D	ESTs	gb:AA977481 ESTs
228614_at	-1	D	ESTs	gb:AW182614 ESTs
228971_at	-1.6	D	ESTs	gb:AI357655 ESTs,
228986_at	-1.1	D	ESTs	gb:AW978375 ESTs,
229114_at	-1.7	D	ESTs	gb:AW237741 ESTs
229132_at	-1.1	D	ESTs	gb:AI346432 ESTs,
229307_at	-1.3	D	ESTs	gb:N32051 ESTs
229359_at	-1	D	ESTs	gb:BE552208 ESTs
229399_at	-1.3	D	ESTs	gb:BF438440 ESTs
229778_at	-1.6	D	ESTs	gb:BE326710 ESTs
229861_at	-1.4	D	ESTs	gb:N66669 ESTs
229879_at	-1.4	D	ESTs	gb:BF059124 ESTs
229956_at	-1.2	D	ESTs	gb:AI659426 ESTs
230147_at	-1.2	D	ESTs	gb:AI378647 ESTs
230560_at	-1.1	D	ESTs	gb:N21096 ESTs
230655_at	-1	D	ESTs	gb:AW025928 ESTs
230760_at	-1	D	ESTs	gb:BF592062 ESTs
230876_at	-1	D	ESTs	gb:AI827906 ESTs
230930_at	-1.4	D	ESTs	gb:AI435839 ESTs
231101_at	-1.4	D	ESTs	gb:AI689803 ESTs
231111_at	-1	D	ESTs	gb:AI122787 ESTs
231121_at	-1.4	D	ESTs	gb:N72151 ESTs
234987_at	-1.9	D	ESTs	gb:AV715309 ESTs,
235003_at	-1.1	D	ESTs	gb:AI249980 ESTs
235125_x_at	-1.2	D	ESTs	gb:AI078279 ESTs
235197_s_at	-1	D	ESTs	gb:AV713913 ESTs
235198_at	-1.1	D	ESTs	gb:AV713913 ESTs
235203_at	-1.1	D	ESTs	gb:AA398756 ESTs
235283_at	-1	D	ESTs	gb:AA262171 ESTs
235413_at	-1	D	ESTs	gb:AW191608 ESTs
235427_at	-1.4	D	ESTs	gb:AA418074 ESTs
235442_at	-2.6	D	ESTs	gb:BF974463 ESTs
235740_at	-1.6	D	ESTs	gb:BG250585 ESTs
235767_x_at	-1	D	ESTs	gb:AI338514 ESTs
235783_at	-1.1	D	ESTs	gb:BG107419 ESTs
235918_x_at	-1.1	D	ESTs	gb:AL559474 ESTs
235964_x_at	-1.4	D	ESTs	gb:AA603344 ESTs
235970_at	-1	D	ESTs	gb:AI807408 ESTs
236140_at	-1	D	ESTs	gb:AI753488 ESTs,
236219_at	-1.1	D	ESTs	gb:AI452512 ESTs
236471_at	-1	D	ESTs	gb:AI949827 ESTs
236588_at	-1.3	D	ESTs	gb:AI918913 ESTs
236600_at	-1.3	D	ESTs	gb:AI651603 ESTs
237246_at	-1	D	ESTs	gb:AI797163 ESTs
237435_at	-1.3	D	ESTs	gb:AI093492 ESTs
237444_at	-1.1	D	ESTs	gb:AI801902 ESTs
237968_at	-1	D	ESTs	gb:AW055205 ESTs
238011_at	-1.3	D	ESTs	gb:BF668314 ESTs
238020_at	-1.1	D	ESTs	gb:BG166796 ESTs
238335_at	-1.2	D	ESTs	gb:BF67829 ESTs
238443_at	-1.1	D	ESTs	gb:BE546873 ESTs
238458_at	-1.3	D	ESTs	gb:AI868167 ESTs
238537_at	-2	D	ESTs	gb:AA330389 ESTs
238562_at	-1.2	D	ESTs	gb:BE542779 ESTs
238608_at	-1.9	D	ESTs	gb:AI174988 ESTs
238719_at	-1	D	ESTs	gb:BF060712 ESTs
238723_at	-1.9	D	ESTs	gb:AW083849 ESTs
238739_at	-1.5	D	ESTs	gb:AW902062 ESTs
238838_at	-1.4	D	ESTs	gb:AI688461 ESTs
238931_at	-1.7	D	ESTs	gb:AL045793 ESTs
238973_s_at	-1.1	D	ESTs	gb:AI458419 ESTs
239268_at	-3.8	D	ESTs	gb:BG390072 ESTs
239363_at	-1.9	D	ESTs	gb:BE328720 ESTs
239415_at	-1.2	D	ESTs	gb:AW117322 ESTs
239680_at	-1.4	D	ESTs	gb:AI220472 ESTs
239825_at	-1.3	D	ESTs	gb:R17746 ESTs
239891_x_at	-1.5	D	ESTs	gb:AA001052 ESTs
239913_at	-1.2	D	ESTs	gb:AI421796 ESTs
240024_at	-1.1	D	ESTs	gb:AI571796 ESTs
240277_at	-2.1	D	ESTs	gb:AI740796 ESTs
240419_at	-1.5	D	ESTs	gb:N25883 ESTs
240486_at	-3.2	D	ESTs	gb:AA761673 ESTs
240592_at	-1	D	ESTs	gb:AI939336 ESTs
241696_at	-1.1	D	ESTs	gb:AA280904 ESTs
241706_at	-1	D	ESTs	gb:AA431782 ESTs,
241716_at	-2.2	D	ESTs	gb:BF965447 ESTs,
241722_x_at	-1.1	D	ESTs	gb:BF724558 ESTs,
242037_at	-1.6	D	ESTs	gb:AA543030 ESTs
242263_at	-1.2	D	ESTs	gb:BE620297 ESTs
242277_at	-1.4	D	ESTs	gb:AW880875 ESTs
242366_at	-1	D	ESTs	gb:AI921844 ESTs
242423_x_at	-1	D	ESTs	gb:AA179510 ESTs,
242691_at	-1	D	ESTs	gb:AA829017 ESTs
242772_x_at	-1.3	D	ESTs	gb:H48551 ESTs
242818_x_at	-1	D	ESTs	gb:R63578 ESTs
242905_at	-1	D	ESTs	gb:AV733347 ESTs
243065_at	-1.8	D	ESTs	gb:AA809449 ESTs
243405_at	-1.1	D	ESTs	gb:AI097337 ESTs
243683_at	-1.1	D	ESTs	gb:H43976 ESTs
243857_at	-1.2	D	ESTs	gb:AI700608 ESTs
243908_at	-1.4	D	ESTs	gb:AI308174 ESTs
244066_at	-1.2	D	ESTs	gb:N34297 ESTs
244111_at	-1.3	D	ESTs	gb:AA699598 ESTs
244187_at	-2.3	D	ESTs	gb:AA053853 ESTs
244569_at	-1.3	D	ESTs	gb:N92755 ESTs
244661_at	-2.2	D	ESTs	gb:AA946876 ESTs
230102_at	-1.2	D	ETV5	gb:AW206458 ets variant gene 5 (ets-related molecule)
204422_s_at	-1.5	D	FGF2	gb:NM_002006 Homo sapiens fibroblast growth factor 2 (basic)
208229_at	-1.1	D	FGFR2	gb:NM_022975 Homo sapiens fibroblast growth factor receptor 2, isoform 8precursor
211200_s_at	-1	D	FGR	gb:BC002836 Homo sapiens, Gardner-Rasheed feline sarcoma viral (v-fgr) oncogene homolog
228477_at	-1.1	D	FLJ10154	gb:R53084 hypothetical protein FLJ10154
225219_at	-1	D	FLJ10174	gb:BF526175 Homo sapiens cDNA FLJ10174 fis, clone HEMBA1003959
225223_at	-1.3	D	FLJ10174	gb:AI478523 Homo sapiens cDNA FLJ10174 fis, clone HEMBA1003959
219355_at	-4.6	D	FLJ10178	gb:NM_018015 Homo sapiens hypothetical protein FLJ10178
232824_at	-2.4	D	FLJ10182	gb:AK001044 Homo sapiens cDNA FLJ10182 fis
217900_at	-1.1	D	FLJ10326	gb:NM_018060 Homo sapiens hypothetical protein FLJ10326
217465_at	-1.1	D	FLJ10429	gb:AK001291 Homo sapiens cDNA FLJ10429 fis,
218772_x_at	-1.4	D	FLJ10493	gb:NM_018112 Homo sapiens hypothetical protein FLJ10493
222735_at	-1.6	D	FLJ10493	gb:AW452608 hypothetical protein FLJ10493
232238_at	-1.2	D	FLJ10518	gb:AK001380 Homo sapiens cDNA FLJ10518 fis
219294_at	-1.1	D	FLJ10545	gb:NM_018132 Homo sapiens hypothetical protein FLJ10545
1570255_s_at	-1.1	D	FLJ10586	gb:BC022380 Homo sapiens cDNA FLJ10586 fis, clone NT2RP2003986
205010_at	-1.7	D	FLJ10613	gb:NM_019067 Homo sapiens hypothetical protein (FLJ10613)
218209_s_at	-1	D	FLJ10656	gb:NM_018170 Homo sapiens hypothetical protein FLJ10656
222558_at	-1.2	D	FLJ10656	gb:T79568 hypothetical protein FLJ10656
222559_s_at	-1	D	FLJ10656	gb:T79568 hypothetical protein FLJ10656
225953_at	-1.1	D	FLJ10656	gb:AI684281 hypothetical protein FLJ10656
218352_at	-1.1	D	FLJ10716	gb:NM_018191 Homo sapiens hypothetical protein FLJ10716
209445_x_at	-1.2	D	FLJ10803	gb:AI765280 hypothetical protein FLJ10803
227896_at	-1.3	D	FLJ10889	gb:AI373643 hypothetical protein FLJ10889
224645_at	-2.2	D	FLJ11074	gb:BG106477 Homo sapiens cDNA FLJ11074 fis, clone PLACE1005027
219177_at	-1.4	D	FLJ11100	gb:NM_018321 Homo sapiens hypothetical protein FLJ11100
225919_s_at	-1	D	FLJ11109	gb:AI832598 hypothetical protein FLJ11109
203224_at	-1.1	D	FLJ11149	gb:BF340123 hypothetical protein FLJ11149
218096_at	-1	D	FLJ11210	gb:NM_018361 Homo sapiens hypothetical protein FLJ11210
226980_at	-1.1	D	FLJ11252	gb:AK001166 hypothetical protein FLJ11252
233666_at	-1.2	D	FLJ11273	gb:AK001834 hypothetical protein FLJ11273
226641_at	-1	D	FLJ11570	gb:AU157224 Homo sapiens cDNA FLJ11570 fis, clone HEMBA1003309
233078_at	-1.1	D	FLJ11587	gb:AK021649 Homo sapiens cDNA FLJ11587 fis
226853_at	-1.7	D	FLJ11663	gb:AU145366 Homo sapiens cDNA FLJ11663 fis, clone HEMBA1004631
228966_at	-1.9	D	FLJ11729	gb:BE674076 hypothetical protein FLJ11729
1561180_at	-1.3	D	FLJ11745	gb:AK021807 Homo sapiens cDNA FLJ11745 fis
215213_at	-4.1	D	FLJ12044	gb:AU146949 Homo sapiens cDNA FLJ12044 fis
213872_at	-1.2	D	FLJ12619	gb:BE465032 hypothetical protein FLJ12619
213875_x_at	-1.1	D	FLJ12619	gb:BG252842 hypothetical protein FLJ12619
227158_at	-1.1	D	FLJ12641	gb:AU149257 Homo sapiens cDNA FLJ12641 fis, clone NT2RM4001953
234747_at	-1.5	D	FLJ12716	gb:AL133076 hypothetical protein FLJ12716
219003_s_at	-1.2	D	FLJ12838	gb:NM_024641 Homo sapiens hypothetical protein FLJ12838
1554155_at	-1.1	D	FLJ12847	gb:BC030702.1 Homo sapiens hypothetical protein FLJ12847,
232184_at	-1.1	D	FLJ12962	gb:AK023024 Homo sapiens cDNA FLJ12962 fis
226217_at	-1.7	D	FLJ13027	gb:AU152456 Homo sapiens cDNA FLJ13027 fis, clone NT2RP3001007
220926_s_at	-1	D	FLJ13033	gb:NM_025191 Homo sapiens hypothetical protein FLJ13033
213652_at	-1	D	FLJ13034	gb:AU152579 Homo sapiens cDNA FLJ13034 fis
220346_at	-1.3	D	FLJ13105	gb:NM_025001 Homo sapiens hypothetical protein FLJ13105
224989_at	-1.2	D	FLJ13289	gb:AI824013 Homo sapiens cDNA FLJ13289 fis, clone OVARC1001170
232466_at	-1.5	D	FLJ13368	gb:AU155661 Homo sapiens cDNA FLJ13368 fis, clone PLACE1000599
226105_at	-1.1	D	FLJ13495	gb:AI672489 Homo sapiens cDNA FLJ13495 fis, clone PLACE1004425
218962_s_at	-1.2	D	FLJ13576	gb:NM_022484 Homo sapiens hypothetical protein FLJ13576
228745_at	-1	D	FLJ13611	gb:AI376997 hypothetical protein FLJ13611
226765_at	-1.4	D	FLJ13700	gb:AA971514 Homo sapiens cDNA FLJ13700 fis
212482_at	-1.3	D	FLJ13910	gb:BF671894 hypothetical protein FLJ13910
231871_at	-1.6	D	FLJ13997	gb:AU160685 Homo sapiens cDNA FLJ13997 fis
230156_x_at	-1.4	D	FLJ14030	gb:AI933049 Homo sapiens cDNA FLJ14030 fis
229589_x_at	-3.8	D	FLJ20159	gb:AW274311 hypothetical protein FLJ20159
225325_at	-1.6	D	FLJ20160	gb:AA133311 hypothetical protein FLJ20160
218035_s_at	-2	D	FLJ20273	gb:NM_019027 Homo sapiens hypothetical protein (FLJ20273)
218460_at	-1.1	D	FLJ20397	gb:NM_017802 Homo sapiens hypothetical protein FLJ20397
1554761_a_at	-1.2	D	FLJ20397	gb:BC010850.1 Homo sapiens, clone MGC:8865 IMAGE:3902385,
217972_at	-3.2	D	FLJ20420	gb:NM_017812 Homo sapiens hypothetical protein FLJ20420
218886_at	-1	D	FLJ20624	gb:NM_017906 Homo sapiens hypothetical protein FLJ20624
224851_at	-1.2	D	FLJ20653	gb:AW274756 Homo sapiens cDNA FLJ20653 fis, clone KAT01739
1554478_a_at	-1.6	D	FLJ20718	gb:BC033077 hypothetical protein FLJ20718
1566191_at	-1.2	D	FLJ20861	gb:AI907884 Homo sapiens cDNA: FLJ20861 fis, clone ADKA01761.
220145_at	-2.9	D	FLJ21159	gb:NM_024826 Homo sapiens hypothetical protein FLJ21159
214918_at	-1.2	D	FLJ21258	gb:AK024911 Homo sapiens cDNA: FLJ21258 fis, clone COL01408
232156_at	-1.1	D	FLJ21268	gb:AK024921 Homo sapiens cDNA: FLJ21268 fis,
228817_at	-1.3	D	FLJ21561	gb:AI085361 Homo sapiens cDNA: FLJ21561 fis, clone COL06415
226261_at	-1.1	D	FLJ21587	gb:AI831561 Homo sapiens cDNA: FLJ21587 fis, clone COL06946
219232_s_at	-1.5	D	FLJ21620	gb:NM_022073.1 Homo sapiens hypothetical protein FLJ21620
222847_s_at	-1	D	FLJ21620	gb:AI378406 hypothetical protein FLJ21620
219008_at	-1	D	FLJ21820	gb:NM_021925 Homo sapiens hypothetical protein FLJ21820
228530_at	-1.1	D	FLJ21869	gb:AA648525 Homo sapiens cDNA: FLJ21869 fis, clone HEP02442
225352_at	-1.3	D	FLJ21895	gb:AI763287 Homo sapiens cDNA: FLJ21895 fis, clone HEP03439
212043_at	-1	D	FLJ21904	gb:W72053 Homo sapiens cDNA: FLJ21904 fis, clone HEP03585
225119_at	-1.3	D	FLJ21939	gb:AW299290 hypothetical protein FLJ21939
219802_at	-1	D	FLJ22028	gb:NM_024854.1 Homo sapiens hypothetical protein FLJ22028
233814_at	-1.1	D	FLJ22256	gb:AK025909 Homo sapiens cDNA: FLJ22256 fis,
220122_at	-1	D	FLJ22344	gb:NM_024717 Homo sapiens hypothetical protein FLJ22344
226390_at	-1.1	D	FLJ22554	gb:AA628398 Homo sapiens cDNA: FLJ22554 fis, clone HSI01092
218791_s_at	-1.2	D	FLJ22557	gb:NM_024713 Homo sapiens hypothetical protein FLJ22557
212812_at	-1.2	D	FLJ22642	gb:AI700633 Homo sapiens cDNA: FLJ22642 fis, clone HSI06970
224819_at	-1	D	FLJ22696	gb:AI743979 Homo sapiens cDNA: FLJ22696 fis, clone HSI11696
219886_at	-1.2	D	FLJ23047	gb:NM_024548 Homo sapiens hypothetical protein FLJ23047
226660_at	-1	D	FLJ23077	gb:AI142096 Homo sapiens cDNA: FLJ23077 fis, clone LNG05840
225290_at	-1	D	FLJ23460	gb:AV692425 Homo sapiens cDNA: FLJ23460 fis, clone HSI07664
219973_at	-1	D	FLJ23548	gb:NM_024590 Homo sapiens hypothetical protein FLJ23548
231500_s_at	-1.1	D	FLJ23602	gb:AV650728 Homo sapiens cDNA: FLJ23602 fis, clone LNG15735
1553726_s_at	-4.5	D	FLJ30899	gb:NM_152730.1 hypothetical protein FLJ30899
1552789_at	-1.1	D	FLJ32803	gb:NM_153039 hypothetical protein FLJ32803
1555945_s_at	-1.1	D	FLJ34466	gb:AK091785 Homo sapiens cDNA FLJ34466 fis,
1555948_s_at	-1.1	D	FLJ34466	gb:AU116818 Homo sapiens cDNA FLJ34466 fis,
213813_x_at	-1.2	D	FTL	gb:AI345238 ferritin, light polypeptide
1565717_s_at	-1	D	FUSCHOP	gb:BE930017 Homo sapiens partial mRNA for FUSCHOP chimaeric fusion protein (type 9 transcript variant)
211794_at	-1.8	D	FYB	gb:AF198052 Homo sapiens EVH1 domain binding protein
205164_at	-1.4	D	GCAT	gb:NM_014291 Homo sapiens glycine C-acetyltransferase (2-amino-3-ketobutyrate coenzyme A ligase)
213129_s_at	-1	D	GCSH	gb:AI970157 glycine cleavage system protein H (aminomethyl carrier)
203159_at	-1	D	GLS	gb:NM_014905 Homo sapiens glutaminase
230101_at	-1.6	D	GRO2	gb:AV648479 GRO2 oncogene
204496_at	-1	D	GS2NA	gb:NM_014574 Homo sapiens nuclear autoantigen
209620_s_at	-1	D	hABC7	gb:AB005289 Homo sapiens mRNA for ABC transporter 7 protein
231061_at	-1.1	D	HDCMA18P	gb:AI671581 HDCMA18P protein
204162_at	-1	D	HEC	gb:NM_006101 Homo sapiens highly expressed in cancer, rich in leucine heptad repeats
202934_at	-1.9	D	HK2	gb:AI761561 hexokinase 2
202540_s_at	-1.2	D	HMGCR	gb:NM_000859 Homo sapiens 3-hydroxy-3-methylglutaryl-Coenzyme A reductase
213150_at	-1.6	D	HOXA10	gb:BF792917 homeo box A10
229204_at	-1.1	D	HP1-BP74	gb:BE218428 HP1-BP74
37170_at	-1.6	D	HRIHFB2017	Cluster Incl. AB015331:Homo sapiens HRIHFB2017 mRNA,
222480_at	-1	D	HSA243666	gb:AW779859 NICE-5 protein
218196_at	-1.4	D	HSPC019	gb:NM_014028 Homo sapiens HSPC019 protein
223559_s_at	-1.7	D	HSPC043	gb:AF161411 Homo sapiens HSPC043 protein
208925_at	-1.3	D	HSPC174	gb:AF161522 Homo sapiens HSPC174
201565_s_at	-1.1	D	ID2	gb:NM_002166 Homo sapiens inhibitor of DNA binding 2, dominant negative helix-loop-helix protein (ID2)
210911_at	-4.1	D	Id2B	gb:M96843 Human striated muscle contraction regulatory protein
201566_x_at	-1.4	D	Id-2H	gb:D13891 Human mRNA for Id-2H, complete cds.
205227_at	-1.2	D	IL1RAP	gb:NM_002182 Homo sapiens interleukin 1 receptor accessory protein
204863_s_at	-1.1	D	IL6ST	gb:BE856546 interleukin 6 signal transducer
214123_s_at	-3.5	D	IMAGE:1736027	gb:AI126492 IMAGE:1736027
225446_at	-1	D	IMAGE:2240238	gb:AI638279 Homo sapiens mRNA full length insert cDNA clone EUROIMAGE 814975
222027_at	-1.6	D	IMAGE:2807078	gb:AW515443 similar to rat nuclear ubiquitous casein kinase 2
1557236_at	-1	D	IMAGE:3071180	gb:BF512806 Homo sapiens partial mRNA; ID EE2-16B
226663_at	-1.3	D	IMAGE:3283909	gb:BE670056 Homo sapiens clone 25061 mRNA sequence
212688_at	-1	D	IMAGE:3447173	gb:BC003393.1 Unknown protein for IMAGE:3447173
213506_at	-1	D	IMAGE:3895653	gb:BE965369 Human proteinase activated receptor-2 mRNA, 3UTR
1558080_s_at	-1	D	IMAGE:4943226	gb:BG913589 Homo sapiens clone IMAGE:943037,
46947_at	-1.3	D	IMAGE-115563	Cluster Incl. T87245:yd91b02.r1 Homo sapiens cDNA, 5 end
64883_at	-1.2	D	IMAGE-2317231	Cluster Incl. AI744083:wc36b04.x1 Homo sapiens cDNA, 3 end
207688_s_at	-1.1	D	INHBC	gb:NM_005538 Homo sapiens inhibin, beta C
205032_at	-1	D	ITGA2	gb:NM_002203 Homo sapiens integrin, alpha 2
216190_x_at	-3.3	D	ITGB1	gb:AA215854 integrin, beta 1 (fibronectin receptor, beta polypeptide, antigen CD29 includes )
231183_s_at	-1.1	D	JAG1	gb:AI457817 jagged 1 (Alagille syndrome)
218976_at	-1.3	D	JDP1	gb:NM_021800 Homo sapiens J domain containing protein 1
223721_s_at	-1.2	D	JDP1	gb:AF176013 Homo sapiens J domain containing protein 1 isoform b (JDP1) mRNA
32088_at	-1.6	D	JEM-1	Cluster Incl. U79751:Human basic-leucine zipper nuclear factor (JEM-1)
200760_s_at	-1.1	D	JWA	gb:N92494 vitamin A responsive; cytoskeleton related
200761_s_at	-1.4	D	JWA	gb:NM_006407 Homo sapiens vitamin A responsive; cytoskeleton related (JWA)
206874_s_at	-1.4	D	KIAA0204	gb:AL138761 Human DNA sequence from clone RP11-16H23 on chromosome 10. Contains the gene KIAA0204 (HSLK) for a protein kinase,
230659_at	-1.2	D	KIAA0212	gb:AW139300 KIAA0212 gene product
201776_s_at	-1.6	D	KIAA0494	gb:AK001487 KIAA0494 gene product
201778_s_at	-1.3	D	KIAA0494	gb:NM_014774 Homo sapiens KIAA0494 gene product
201775_s_at	-1.5	D	KIAA0494	gb:AA676790 KIAA0494 gene product
212213_x_at	-1.4	D	KIAA0567	gb:AB011139 Homo sapiens mRNA for KIAA0567 protein
208958_at	-1.8	D	KIAA0573	gb:AI827677 KIAA0573 protein
205069_s_at	-1.3	D	KIAA0621	gb:NM_01507 Homo sapiens GTPase regulator associated with the focal adhesion kinase pp125(FAK); KIAA0621 protein
204049_s_at	-1.1	D	KIAA0680	gb:NM_014721 Homo sapiens KIAA0680 gene product
213120_at	-1.1	D	KIAA0701	gb:AA405798 KIAA0701 protein
201026_at	-1.3	D	KIAA0741	gb:AB018284 Homo sapiens mRNA for KIAA0741 protein
214313_s_at	-1.6	D	KIAA0741	gb:BE138647 KIAA0741 gene product
227766_at	-2.3	D	KIAA0758	gb:AI829314 KIAA0758 protein
212633_at	-1.3	D	KIAA0776	gb:AL132776 KIAA0776 protein
212634_at	-1.2	D	KIAA0776	gb:AW298092 KIAA0776 protein
212546_s_at	-1.1	D	KIAA0826	gb:AI126634 KIAA0826 protein
212548_s_at	-1.3	D	KIAA0826	gb:BF515124 KIAA0826 protein
221905_at	-1.5	D	KIAA0849	gb:BF516433 KIAA0849 protein
212289_at	-1.3	D	KIAA0874	gb:AB020681 Homo sapiens mRNA for KIAA0874 protein
212106_at	-1.3	D	KIAA0887	gb:BF116183 KIAA0887 protein
212108_at	-1.3	D	KIAA0887	gb:AB020694 Homo sapiens mRNA for KIAA0887 protein
213954_at	-1.1	D	KIAA0888	gb:AB020695 Homo sapiens mRNA for KIAA0888 protein
205594_at	-1.2	D	KIAA0924	gb:NM_014897 Homo sapiens KIAA0924 protein
213229_at	-1.3	D	KIAA0928	gb:BF590131 KIAA0928
201996_s_at	-1	D	KIAA0929	gb:AL524033 KIAA0929 protein Msx2 interacting nuclear target (MINT) homolog
204742_s_at	-1.1	D	KIAA0979	gb:NM_015032 Homo sapiens KIAA0979 protein
209748_at	-1	D	KIAA1083	gb:AB029006 Homo sapiens mRNA for KIAA1083 protein
230618_s_at	-1.5	D	KIAA1096	gb:BF110903 KIAA1096 protein
217437_s_at	-1.4	D	KIAA1103	gb:AB029026 Homo sapiens mRNA for KIAA1103 protein
231829_at	-1	D	KIAA1271	gb:AB033097 Homo sapiens mRNA for KIAA1271 protein
232861_at	-2	D	KIAA1348	gb:AB037769 Homo sapiens mRNA for KIAA1348 protein
224961_at	-1.4	D	KIAA1360	gb:AB037781 Homo sapiens mRNA for KIAA1360 protein
227454_at	-1	D	KIAA1361	gb:AB037782.1 /DB_XREF=gi:7243102 /GEN=KIAA1361 /FEA=mRNA /CNT=47 /TID=Hs.15119.0 /TIER=Stack /STK=11 /UG=Hs.15119 /LL=57551 /DEF=Homo sapiens mRNA for KIAA1361 protein, partial cds. /PROD=KIAA1361 protein
230569_at	-1.1	D	KIAA1430	gb:AA868380 KIAA1430 protein
224704_at	-1.2	D	KIAA1460	gb:N21600 KIAA1460 protein
224705_s_at	-1.2	D	KIAA1460	gb:AI684626 KIAA1460 protein
224831_at	-1.1	D	KIAA1673	gb:BE620832 KIAA1673
214709_s_at	-1	D	kinectin	gb:Z22551 H.sapiens kinectin gene
200914_x_at	-1	D	KTN1	gb:BF589024 kinectin 1
200915_x_at	-1	D	KTN1	gb:NM_004986 Homo sapiens kinectin 1
206140_at	-1.2	D	LHX2	gb:NM_004789 Homo sapiens LIM homeobox protein 2
206235_at	-1.6	D	LIG4	gb:NM_002312 Homo sapiens ligase IV, DNA, ATP-dependent
222762_x_at	-1.2	D	LIMD1	gb:AU144259 LIM domains containing 1
210876_at	-1	D	LIP	gb:M62896 Human lipocortin (LIP) 2 pseudogene
222487_s_at	-1	D	LOC51065	gb:BC003667 Homo sapiens, Similar to 40S ribosomal protein S27 isoform, clone MGC:12175
222038_s_at	-1.2	D	LOC51096	gb:AA993099 CGI-48 protein
218694_at	-1.8	D	LOC51309	gb:NM_016608 Homo sapiens ALEX1 protein (LOC51309),
218303_x_at	-1	D	LOC51315	gb:NM_016618. Homo sapiens hypothetical protein (LOC51315)
1555501_s_at	-1.3	D	LOC51319	gb:BC010357 Homo sapiens, Similar to hypothetical protein, clone MGC:13367 IMAGE:4249317,
213747_at	-1.1	D	LOC51582	gb:AA047234 LOC51582
228483_s_at	-1	D	LOC51616	gb:BE856250 neuronal cell death-related protein
217824_at	-1	D	LOC51632	gb:AW500009 CGI-76 protein
217825_s_at	-1.1	D	LOC51632	gb:AF151039 Homo sapiens HSPC205
213868_s_at	-1.3	D	LOC51635	gb:AW243128 EST
224216_at	-1.3	D	LOC55864	gb:AF222858 Homo sapiens uncharacterized gastric protein YC11P
213734_at	-1.4	D	LOC55884	gb:BG260658 CS box-containing WD protein
227535_at	-1.1	D	LOC56851	gb:AA149655 chromosome 11 hypothetical protein ORF3
218901_at	-1.3	D	LOC57088	gb:NM_020353 Homo sapiens phospholipid scramblase 4 (LOC57088)
220020_at	-1.3	D	LOC63929	gb:NM_022098 Homo sapiens hypothetical protein LOC63929
226287_at	-1.2	D	LOC81023	gb:AI458313 hypothetical protein AF301222
221268_s_at	-1.4	D	LOC81537	gb:NM_030791 Homo sapiens sphingosine-1-phosphatase (LOC81537),
223391_at	-1.9	D	LOC81537	gb:BE880703 sphingosine-1-phosphatase
221847_at	-1.3	D	LPRP	gb:BF665706 lacrimal proline rich protein
234432_at	-1.8	D	MB2	gb:AF100640 Homo sapiens metastasis related protein
214056_at	-1.3	D	MCL1	gb:BF981280 myeloid cell leukemia sequence 1 (BCL2-related)
219209_at	-1	D	MDA5	gb:NM_022168 Homo sapiens melanoma differentiation associated protein-5
224480_s_at	-1.5	D	MGC:11324	gb:BC006236 Homo sapiens, clone MGC:11324
1554277_s_at	-2.3	D	MGC:33438	gb:BC036056 Homo sapiens, clone MGC:33438 IMAGE:5270515
1554733_at	-3.3	D	MGC24125	gb:AK097110 hypothetical protein MGC24125
218265_at	-1.1	D	MGC3156	gb:NM_024077 Homo sapiens hypothetical protein MGC3156
224250_s_at	-1.2	D	MGC3156	gb:BC001189 Homo sapiens, clone MGC:3156, mRNA
1553749_at	-1.7	D	MGC33371	gb:NM_144664 hypothetical protein MGC33371
1570253_a_at	-1.1	D	MGC34869	gb:BC014155 hypothetical protein MGC34869
1552575_a_at	-1.2	D	MGC46457	gb:NM_153344 Homo sapiens hypothetical protein MGC46457 (
1554314_at	-1.4	D	MGC46457	gb:BC036917 Homo sapiens, clone MGC:46457 I
201764_at	-1.1	D	MGC5576	gb:NM_024056 Homo sapiens hypothetical protein MGC5576 (MGC5576)
209585_s_at	-1.1	D	MINPP1	gb:AF084943 Homo sapiens multiple inositol polyphosphate phosphatase
1553575_at	-1	D	MTND6	gb:NM_173714.1 Homo sapiens NADH dehydrogenase 6
203200_s_at	-1	D	MTRR	gb:NM_024010 Homo sapiens 5-methyltetrahydrofolate-homocysteine methyltransferase reductase transcript variant 2
226101_at	-1.2	D	MUM2	gb:AI093546 MUM2 protein
203216_s_at	-1	D	MYO6	gb:NM_004999 Homo sapiens myosin VI
204702_s_at	-1	D	NFE2L3	gb:NM_004289 Homo sapiens nuclear factor (erythroid-derived 2)-like 3
231559_at	-2.1	D	NNMT	gb:AV650983 nicotinamide N-methyltransferase
214101_s_at	-1	D	NPEPPS	gb:BG153399 aminopeptidase puromycin sensitive
221803_s_at	-1	D	NRBF-2	gb:AA883074 nuclear receptor binding factor-2
202600_s_at	-1.1	D	NRIP1	gb:AI824012 nuclear receptor interacting protein 1
212298_at	-1	D	NRP1	gb:BE620457 neuropilin 1
203939_at	-1.1	D	NT5	gb:NM_002526 Homo sapiens 5 nucleotidase
1553994_at	-1.2	D	NT5E	gb:BC015940 Homo sapiens, Similar to 5 nucleotidase (CD73),
220183_s_at	-1.2	D	NUDT6	gb:NM_007083 Homo sapiens nudix (nucleoside diphosphate linked moiety X)-type motif 6
223381_at	-1.3	D	NUF2R	gb:AF326731 Homo sapiens NUF2R mRNA
231002_s_at	-1	D	NUP88	gb:AA778438 nucleoporin 88kD
210135_s_at	-1.1	D	OG12	gb:AF022654 Homo sapiens homeodomain protein
212214_at	-1.2	D	OPA1	gb:BF439570 optic atrophy 1 (autosomal dominant)
214306_at	-1.9	D	OPA1	gb:AA209332 optic atrophy 1
206825_at	-1.5	D	OXTR	gb:NM_000916 Homo sapiens oxytocin receptor
218589_at	-1	D	P2Y5	gb:NM_005767 Homo sapiens purinergic receptor
217426_at	-1.7	D	PCDHGC3	gb:L11372 Human protocadherin 43
223359_s_at	-3.9	D	PDE7A1	gb:L12052 Homo sapiens cAMP phosphodiesterase PDE7
229830_at	-1.3	D	PDGFA	gb:AW205919 platelet-derived growth factor alpha polypeptide
203067_at	-1	D	PDX1	gb:NM_003477 Homo sapiens Pyruvate dehydrogenase complex, lipoyl-containing component X; E3-binding protein
217383_at	-1.6	D	phosphoglycerate kinase	gb:S81916 phosphoglycerate kinase
212120_at	-1.1	D	PIGF	gb:BE897886 phosphatidylinositol glycan, class F
212122_at	-1.2	D	PIGF	gb:AW771590 phosphatidylinositol glycan, class F
202619_s_at	-1.6	D	PLOD2	gb:AI754404 procollagen-lysine, 2-oxoglutarate 5-dioxygenase (
202620_s_at	-1.7	D	PLOD2	gb:NM_000935 Homo sapiens procollagen-lysine, 2-oxoglutarate 5-dioxygenase (lysine hydroxylase) 2
206942_s_at	-1.8	D	PMCH	gb:NM_002674 Homo sapiens pro-melanin-concentrating hormone
1567213_at	-1.4	D	PNN	gb:U59479 pinin, desmosome associated protein
219926_at	-1.3	D	POP3	gb:NM_022361 Homo sapiens popeye protein 3
208995_s_at	-1	D	PPIG	gb:U40763 Human Clk-associated RS cyclophilin CARS-Cyp
231370_at	-1	D	PPM1A	gb:AI701170 protein phosphatase 1A (formerly 2C), magnesium-dependent, alpha isoform
229606_at	-1.1	D	PPP3CA	gb:AI827550 protein phosphatase 3 (formerly 2B), catalytic subunit, alpha isoform (calcineurin A alpha)
200975_at	-1.4	D	PPT1	gb:NM_000310 Homo sapiens palmitoyl-protein thioesterase 1
201858_s_at	-1.1	D	PRG1	gb:J03223 proteoglycan 1, secretory granule
212628_at	-1.1	D	PRKCL2	gb:BG292065 protein kinase C-like 2
209139_s_at	-1.1	D	PRKRA	gb:AF083033 Homo sapiens PKR-associating protein RAX
210098_s_at	-1.3	D	PRO0522	gb:AF13010 Homo sapiens clone FLB2205 PRO0522 Mrna
210596_at	-2.2	D	PRO0756	gb:AF130104 Homo sapiens clone FLB3024 PRO0756
223577_x_at	-1.3	D	PRO1073	gb:AA827878 PRO1073 protein
223578_x_at	-1.2	D	PRO1073	gb:AF113016 Homo sapiens PRO1073 mRNA
228582_x_at	-1.5	D	PRO1073	gb:AI475544 PRO1073 protein
231735_s_at	-1.3	D	PRO1073	gb:NM_014086 PRO1073 protein
210733_at	-1.3	D	PRO1292	gb:AF130055 Homo sapiens clone FLB4941 PRO1292
229163_at	-1	D	PRO1489	gb:N75559 hypothetical protein PRO1489
224346_at	-1.1	D	PRO1853	gb:AF116671 Homo sapiens PRO1853
220608_s_at	-1.6	D	PRO1914	gb:NM_014106 Homo sapiens PRO1914 protein
223361_at	-1.8	D	PRO2013	gb:AF116682 Homo sapiens PRO2013
211437_at	-3.3	D	PRO2660	gb:AF130093 Homo sapiens clone FLB9835 PRO2660
224261_at	-1.3	D	PRO3098	gb:AF119917 Homo sapiens PRO3098 mRNA
211085_s_at	-1	D	protein-serinethreonine kinase	gb:Z25430 H.sapiens protein-serinethreonine kinase gene
209535_s_at	-1.1	D	proto-LBC	gb:AF127481 Homo sapiens non-ocogenic Rho GTPase-specific GTP exchange factor (
230352_at	-1.1	D	PRPS2	gb:AI392908 phosphoribosyl pyrophosphate synthetase 2
223268_at	-1	D	PTD012	gb:BF109592 PTD012 protein
214008_at	-1	D	PTK9	gb:N25562 protein tyrosine kinase 9
228128_x_at	-1	D	PTMA	gb:AI110886 prothymosin, alpha
204020_at	-1	D	PURA	gb:BF739943 purine-rich element binding protein A
212636_at	-1.6	D	QKI	gb:AL031781 Human DNA sequence from clone 51J12 on chromosome 6q26-27
221960_s_at	-1	D	RAB2	gb:AI189609 RAB2, member RAS oncogene family
230750_at	-1.7	D	RAB23	gb:AI290475 RAB23, member RAS oncogene family
221523_s_at	-1.3	D	RAGD	gb:AL138717 Rag D protein
200995_at	-1.1	D	RANBP7	gb:AI741392 RAN binding protein 7
203185_at	-1	D	RASSF2	gb:NM_014737 Homo sapiens Ras association (RalGDSAF-6) domain family 2 (
205407_at	-1.2	D	RECK	gb:NM_021111 Homo sapiens reversion-inducing-cysteine-rich protein with kazal motifs
213878_at	-1	D	RECQL	gb:AI685944 RecQ protein-like (DNA helicase Q1-like)
211468_s_at	-2.3	D	RECQL5 gamma	gb:AB042825 Homo sapiens DNA helicase recQ5 gamma
210138_at	-1.2	D	RGSZ1	gb:AF074979 Homo sapiens regulator of G protein signaling-Z
201451_x_at	-3.9	D	Rheb	gb:D78132 Rheb Homo sapiens ras-related GTP-binding protein
213409_s_at	-1.5	D	RHEB2	gb:BF593727 Ras homolog enriched in brain 2
216563_at	-1.5	D	ribosomal protein L18a	gb:X80821 H.sapiens mRNA for ribosomal protein L18a homologue
211767_at	-1.8	D	RIKEN	gb:BC005995 Homo sapiens, Similar to RIKEN cDNA 4933405K01 gene, clone MGC:14799
233729_at	-2.9	D	RNAC	gb:AK021739 RNA cyclase homolog
205215_at	-1.3	D	RNF2	gb:NM_007212 Homo sapiens ring finger protein 2
206653_at	-1.3	D	RPC32	gb:BF062139 polymerase (RNA) III (DNA directed)
206654_s_at	-1.2	D	RPC32	gb:NM_006467 Homo sapiens polymerase (RNA) III (DNA directed)
214041_x_at	-1	D	RPL37A	gb:BE857772 ribosomal protein L37a
221943_x_at	-1.1	D	RPL38	gb:AW303136 ribosomal protein L38
202028_s_at	-1.1	D	RPL38	gb:BC000603. Homo sapiens, ribosomal protein L38, clone MGC:1637
213903_s_at	-2.4	D	RQCD1	gb:AI380850 rcd1 (required for cell differentiation, S.pombe) homolog 1
200872_at	-1.4	D	S100A10	gb:NM_002966 Homo sapiens S100 calcium-binding protein A10 (S100A10)
201542_at	-1	D	SAR1	gb:AY008268 Homo sapiens GTP-binding protein SAR1
223839_s_at	-1.4	D	SCD	gb:AF132203 Homo sapiens PRO1933 mRNA
222717_at	-1.1	D	SDPR	gb:BF982174 serum deprivation response (phosphatidylserine-binding protein)
202083_s_at	-1	D	SEC14L1	gb:AI017770 SEC14 (S. cerevisiae)-like 1
212900_at	-1	D	SEC24A	gb:AJ131244 Homo sapiens mRNA for Sec24 protein
230265_at	-1.9	D	SEL1L	gb:BE671138 sel-1 (suppressor of lin-12, C.elegans)-like
226619_at	-1	D	SENP1	gb:AW665440 sentrinSUMO-specific protease
200969_at	-1.4	D	SERP1	gb:BG107676 stress-associated endoplasmic reticulum protein 1; ribosome associated membrane protein 4
209898_x_at	-1.2	D	SH3P18	gb:U61167 Human SH3 domain-containing protein SH3P18
208924_at	-1	D	Sid1669p	gb:AB024703 Homo sapiens mRNA for Sid1669p
204362_at	-1.9	D	SKAP55	gb:NM_003930 =Homo sapiens SKAP55 homologue
216899_s_at	-1.5	D	SKAP-HOM	gb:AC003999 SKAP55 homologue
202235_at	-1	D	SLC16A1	gb:BF511091 solute carrier family 16 (monocarboxylic acid transporters), member 1
205234_at	-1.1	D	SLC16A4	gb:NM_004696 Homo sapiens solute carrier family 16 (monocarboxylic acid transporters), member 4
230416_at	-1.3	D	SLC18A2	gb:AI709335 solute carrier family 18 (vesicular monoamine), member 2
205799_s_at	-1	D	SLC3A1	gb:M95548 Homo sapiens amino acid transport protein
227990_at	-1.2	D	SLU7	gb:AA843238 step II splicing factor SLU7
205187_at	-1.4	D	SMAD5	gb:AF010601 Homo sapiens SMAD5
203875_at	-1.1	D	SMARCA1	gb:NM_003069 Homo sapiens SWISNF related, matrix associated, actin dependent regulator of chromatin, subfamily a, member 1
203852_s_at	-1.1	D	SMN1	gb:NM_000344 survival of motor neuron 1, telomeric isoform d
230820_at	-1.1	D	SMURF2	gb:BF111169 E3 ubiquitin ligase SMURF2
215450_at	-1.1	D	SNRPE	gb:W87901 small nuclear ribonucleoprotein polypeptide E
231393_x_at	-2.2	D	SNRPG	gb:AW237165 / small nuclear ribonucleoprotein polypeptide G
217792_at	-1.3	D	SNX5	gb:NM_014426 Homo sapiens sorting nexin 5
222417_s_at	-1.2	D	SNX5	gb:AF121855 Homo sapiens sorting nexin 5
229980_s_at	-1.1	D	SNX5	gb:AA131508 sorting nexin 5
221561_at	-1.1	D	SOAT1	gb:L21934 Homo sapiens acyl-coenzyme A: cholesterol acyltransferase
1570552_at	-1.1	D	squamous cell carcinoma-related protein-1	gb:AF363068 Homo sapiens squamous cell carcinoma-related protein-1
208802_at	-1.4	D	SRP72	gb:AI493872 signal recognition particle 72kD
230091_at	-1	D	SRPK2	gb:AA046241 /DB_XREF=gi:1526133 /DB_XREF=zk77c01.s1 /CLONE=IMAGE:488832 /FEA=EST /CNT=15 /TID=Hs.78353.1 /TIER=Stack /STK=9 /UG=Hs.78353 /LL=6733 /UG_GENE=SRPK2 /UG_TITLE=SFRS protein kinase 2
204634_at	-1	D	STK2	gb:NM_003157 Homo sapiens serinethreonine kinase 2
203310_at	-1.1	D	STXBP3	gb:NM_007269 Homo sapiens syntaxin binding protein 3
212459_x_at	-1.1	D	SUCLG2	gb:BF593940 succinate-CoA ligase, GDP-forming, beta subunit
214835_s_at	-1	D	SUCLG2	gb:AF131748 Homo sapiens clone 25191 GTP-specific succinyl-CoA synthetase beta subunit (SCS) mRNA sequence
1554690_a_at	-1.6	D	TACC1	gb:BC041391 Homo sapiens, Similar to transforming, acidic coiled-coil containing protein 1, clone MGC:43967 IMAGE:5276767
225348_at	-1	D	TASR1	gb:AI954700 TLS-associated serine-arginine protein 1
225798_at	-1	D	TAX1BP1	gb:AL047908 Tax1 (human T-cell leukemia virus type I) binding protein 1
203176_s_at	-1.3	D	TCF6L1	gb:BE552470 transcription factor 6-like 1 (mitochondrial transcription factor 1-like)
203177_x_at	-1.3	D	TCF6L1	gb:NM_00320 Homo sapiens transcription factor 6-like 1 (mitochondrial transcription factor 1-like)
200804_at	-1.2	D	TEGT	gb:NM_003217 Homo sapiens testis enhanced gene transcript (TEGT)
208541_x_at	-1.1	D	TFAM	gb:NM_012251 Homo sapiens transcription factor A, mitochondrial
210665_at	-1.2	D	TFPIbeta	gb:AF021834 Homo sapiens tissue factor pathway inhibitor beta
204391_x_at	-1.3	D	TIF1	gb:NM_015905 Homo sapiens transcriptional intermediary factor 1
213301_x_at	-1.2	D	TIF1	gb:AL538264 transcriptional intermediary factor 1
205217_at	-1.6	D	TIMM8A	gb:NM_004085 Homo sapiens translocase of inner mitochondrial membrane 8(yeast) homolog A
231775_at	-1	D	TNFRSF10A	gb:W65310 tumor necrosis factor receptor superfamily, member 10a
228834_at	-1	D	TOB1	gb:BF240286 transducer of ERBB2, 1
203671_at	-1.5	D	TPMT	gb:BF196891 thiopurine S-methyltransferase
223599_at	-1	D	TRIM6	gb:AF220030 Homo sapiens tripartite motif protein TRIM6
216609_at	-1.3	D	TXN delta 3	gb:AF065241 Homo sapiens thioredoxin delta 3
223167_s_at	-1.1	D	USP25	gb:AF170562 Homo sapiens ubiquitin-specific processing protease
229501_s_at	-1.1	D	USP8	gb:AI393759 ubiquitin specific protease 8
202745_at	-1.3	D	USP8	gb:NM_005154 Homo sapiens ubiquitin specific protease 8
217416_x_at	-1.3	D	VAPA	gb:AK000918 vesicle-associated membrane protein -associated protein A
218806_s_at	-1.2	D	VAV-3	gb:AF118887 Homo sapiens VAV-3 protein
208844_at	-1	D	VDAC3	gb:BC002456 Homo sapiens, voltage-dependent anion channel 3, clone MGC:1966
203255_at	-1	D	VIT1	gb:NM_018693 Homo sapiens vitiligo-associated protein VIT-1
222062_at	-1.4	D	WSX-1	gb:AI983115 class I cytokine receptor
209045_at	-1	D	XPNPEP1	gb:AF195530 Homo sapiens soluble aminopeptidase P
213097_s_at	-1.2	D	ZRF1	gb:AI338837 zuotin related factor 1
